# Supplementary material for: PMBD: a Comprehensive Plastics Microbial Biodegradation Database
Source: Oxford University Press journal article supplement (doi:10.1093/database/baz119), 2019-01-01
Supplement: supplement_file_baz119.pdf [file supplement_file_baz119.pdf]

# Supplementary File

| Searching keywords                                                                               | Retrieved literatures | Matched literatures |
|--------------------------------------------------------------------------------------------------|-----------------------|---------------------|
| (plastics[Title/Abstract] and biodegradation[Title/Abstract])                                    | 126                   | 30                  |
| (polymer[Title/Abstract] and biodegradation[Title/Abstract])                                     | 769                   | 22                  |
| (phthalate[Title/Abstract] and biodegradation[Title/Abstract])                                   | 232                   | 47                  |
| (PE[Title/Abstract] and biodegradation[Title/Abstract])                                          | 30                    | 7                   |
| (PU[Title/Abstract] and biodegradation[Title/Abstract])                                          | 52                    | 4                   |
| (PLA[Title/Abstract] and biodegradation[Title/Abstract])                                         | 122                   | 7                   |
| (PVA[Title/Abstract] and biodegradation[Title/Abstract])                                         | 83                    | 16                  |
| (PVC[Title/Abstract] and biodegradation[Title/Abstract])                                         | 28                    | 11                  |
| (PHB[Title/Abstract] and biodegradation[Title/Abstract])                                         | 58                    | 7                   |
| (PHA[Title/Abstract] and biodegradation[Title/Abstract])                                         | 46                    | 4                   |
| (PET[Title/Abstract] and biodegradation[Title/Abstract])                                         | 28                    | 5                   |
| (PBS[Title/Abstract] and biodegradation[Title/Abstract])                                         | 96                    | 1                   |
| (PBST[Title/Abstract] and biodegradation[Title/Abstract])                                        | 0                     | 0                   |
| (PBSA[Title/Abstract] and biodegradation[Title/Abstract])                                        | 10                    | 2                   |
| (PBA[Title/Abstract] and biodegradation[Title/Abstract])                                         | 15                    | 0                   |
| (PBAT[Title/Abstract] and biodegradation[Title/Abstract])                                        | 11                    | 3                   |
| (PEF[Title/Abstract] and biodegradation[Title/Abstract])                                         | 2                     | 2                   |
| (PCL[Title/Abstract] and biodegradation[Title/Abstract])                                         | 147                   | 8                   |
| (PES[Title/Abstract] and biodegradation[Title/Abstract])                                         | 11                    | 1                   |
| (PEA[Title/Abstract] and biodegradation[Title/Abstract])                                         | 22                    | 0                   |
| (PS[Title/Abstract] and biodegradation[Title/Abstract])                                          | 74                    | 2                   |
| (PP[Title/Abstract] and biodegradation[Title/Abstract])                                          | 37                    | 3                   |
| (Polyethylene[Title/Abstract] and biodegradation[Title/Abstract])                                | 243                   | 28                  |
| (Polyurethane[Title/Abstract] and biodegradation[Title/Abstract])                                | 193                   | 7                   |
| (Polylactic acid[Title/Abstract] and biodegradation[Title/Abstract])                             | 50                    | 3                   |
| (Polyvinyl alcohol[Title/Abstract] and biodegradation[Title/Abstract])                           | 69                    | 18                  |
| (Polyvinyl chloride[Title/Abstract] and biodegradation[Title/Abstract])                          | 18                    | 9                   |
| (Poly(3-hydroxybutyrate)[Title/Abstract] and biodegradation[Title/Abstract])                     | 0                     | 0                   |
| (Poly(3-hydroxyalkanoates)[Title/Abstract] and biodegradation[Title/Abstract])                   | 0                     | 0                   |
| (Polyethylene terephthalate[Title/Abstract] and biodegradation[Title/Abstract])                  | 13                    | 3                   |
| (Polybutylene succinate[Title/Abstract] and biodegradation[Title/Abstract])                      | 1                     | 0                   |
| (Poly(butylene succinate-co-terephthalate)[Title/Abstract] and biodegradation[Title/Abstract])   | 0                     | 0                   |
| (Poly(butylene succinate-co-adipate)[Title/Abstract] and biodegradation[Title/Abstract])         | 0                     | 0                   |
| (Polybutylene adipate[Title/Abstract] and biodegradation[Title/Abstract])                        | 0                     | 0                   |
| (Poly(butylene adipate-co-terephthalate)[Title/Abstract] and biodegradation[Title/Abstract])     | 1                     | 0                   |
| (Poly(ethylene furanoate)[Title/Abstract] and biodegradation[Title/Abstract])                    | 0                     | 0                   |
| (Polycaprolactone[Title/Abstract] and biodegradation[Title/Abstract])                            | 84                    | 4                   |
| (Polyethylene succinate[Title/Abstract] and biodegradation[Title/Abstract])                      | 2                     | 1                   |
| (Polyethylene adipate[Title/Abstract] and biodegradation[Title/Abstract])                        | 3                     | 0                   |
| (Polystyrene[Title/Abstract] and biodegradation[Title/Abstract])                                 | 58                    | 8                   |
| (Polypropylene[Title/Abstract] and biodegradation[Title/Abstract])                               | 53                    | 5                   |
| (plastics[Title/Abstract] and hydrolysis[Title/Abstract])                                        | 91                    | 5                   |
| (polymer[Title/Abstract] and hydrolysis[Title/Abstract])                                         | 2451                  | 7                   |
| (phthalate[Title/Abstract] and hydrolysis[Title/Abstract])                                       | 186                   | 5                   |
| (PE[Title/Abstract] and hydrolysis[Title/Abstract])                                              | 330                   | 1                   |
| (PU[Title/Abstract] and hydrolysis[Title/Abstract])                                              | 84                    | 1                   |
| (PLA[Title/Abstract] and hydrolysis[Title/Abstract])                                             | 388                   | 2                   |
| (PVA[Title/Abstract] and hydrolysis[Title/Abstract])                                             | 119                   | 0                   |
| (PVC[Title/Abstract] and hydrolysis[Title/Abstract])                                             | 39                    | 0                   |
| (PHB[Title/Abstract] and hydrolysis[Title/Abstract])                                             | 105                   | 6                   |
| (PHA[Title/Abstract] and hydrolysis[Title/Abstract])                                             | 128                   | 4                   |
| (PET[Title/Abstract] and hydrolysis[Title/Abstract])                                             | 364                   | 4                   |
| (PBS[Title/Abstract] and hydrolysis[Title/Abstract])                                             | 191                   | 1                   |
| (PBST[Title/Abstract] and hydrolysis[Title/Abstract])                                            | 4                     | 0                   |
| (PBSA[Title/Abstract] and hydrolysis[Title/Abstract])                                            | 15                    | 0                   |
| (PBA[Title/Abstract] and hydrolysis[Title/Abstract])                                             | 26                    | 0                   |
| (PBAT[Title/Abstract] and hydrolysis[Title/Abstract])                                            | 8                     | 4                   |
| (PEF[Title/Abstract] and hydrolysis[Title/Abstract])                                             | 8                     | 0                   |
| (PCL[Title/Abstract] and hydrolysis[Title/Abstract])                                             | 130                   | 2                   |
| (PES[Title/Abstract] and hydrolysis[Title/Abstract])                                             | 32                    | 1                   |
| (PEA[Title/Abstract] and hydrolysis[Title/Abstract])                                             | 244                   | 0                   |
| (PS[Title/Abstract] and hydrolysis[Title/Abstract])                                              | 521                   | 1                   |
| (PP[Title/Abstract] and hydrolysis[Title/Abstract])                                              | 262                   | 0                   |
| (Polyethylene[Title/Abstract] and hydrolysis[Title/Abstract])                                    | 448                   | 5                   |
| (Polyurethane[Title/Abstract] and hydrolysis[Title/Abstract])                                    | 136                   | 2                   |
| (Polylactic acid[Title/Abstract] and hydrolysis[Title/Abstract])                                 | 47                    | 1                   |
| (Polyvinyl alcohol[Title/Abstract] and hydrolysis[Title/Abstract])                               | 71                    | 1                   |
| (Polyvinyl chloride[Title/Abstract] and hydrolysis[Title/Abstract])                              | 24                    | 1                   |
| (Poly(3-hydroxybutyrate)[Title/Abstract] and hydrolysis[Title/Abstract])                         | 0                     | 0                   |
| (Poly(3-hydroxyalkanoates)[Title/Abstract] and hydrolysis[Title/Abstract])                       | 0                     | 0                   |
| (Polyethylene terephthalate[Title/Abstract] and hydrolysis[Title/Abstract])                      | 43                    | 5                   |
| (Polybutylene succinate[Title/Abstract] and hydrolysis[Title/Abstract])                          | 4                     | 0                   |
| (Poly(butylene succinate-co-terephthalate)[Title/Abstract] and hydrolysis[Title/Abstract])       | 0                     | 0                   |
| (Poly(butylene succinate-co-adipate)[Title/Abstract] and hydrolysis[Title/Abstract])             | 4                     | 0                   |
| (Polybutylene adipate[Title/Abstract] and hydrolysis[Title/Abstract])                            | 1                     | 0                   |
| (Poly(butylene adipate-co-terephthalate)[Title/Abstract] and hydrolysis[Title/Abstract])         | 0                     | 0                   |
| (Poly(ethylene furanoate)[Title/Abstract] and hydrolysis[Title/Abstract])                        | 0                     | 0                   |
| (Polycaprolactone[Title/Abstract] and hydrolysis[Title/Abstract])                                | 61                    | 4                   |
| (Polyethylene succinate[Title/Abstract] and hydrolysis[Title/Abstract])                          | 2                     | 1                   |
| (Polyethylene adipate[Title/Abstract] and hydrolysis[Title/Abstract])                            | 5                     | 0                   |
| (Polystyrene[Title/Abstract] and hydrolysis[Title/Abstract])                                     | 206                   | 1                   |
| (Polypropylene[Title/Abstract] and hydrolysis[Title/Abstract])                                   | 66                    | 0                   |
| (plastics[Title/Abstract] and depolymerization[Title/Abstract])                                  | 27                    | 1                   |
| (polymer[Title/Abstract] and depolymerization[Title/Abstract])                                   | 425                   | 2                   |
| (phthalate[Title/Abstract] and depolymerization[Title/Abstract])                                 | 3                     | 0                   |
| (PE[Title/Abstract] and depolymerization[Title/Abstract])                                        | 8                     | 1                   |
| (PU[Title/Abstract] and depolymerization[Title/Abstract])                                        | 1                     | 0                   |
| (PLA[Title/Abstract] and depolymerization[Title/Abstract])                                       | 11                    | 1                   |
| (PVA[Title/Abstract] and depolymerization[Title/Abstract])                                       | 5                     | 1                   |
| (PVC[Title/Abstract] and depolymerization[Title/Abstract])                                       | 1                     | 0                   |
| (PHB[Title/Abstract] and depolymerization[Title/Abstract])                                       | 17                    | 0                   |
| (PHA[Title/Abstract] and depolymerization[Title/Abstract])                                       | 27                    | 1                   |
| (PET[Title/Abstract] and depolymerization[Title/Abstract])                                       | 16                    | 0                   |
| (PBS[Title/Abstract] and depolymerization[Title/Abstract])                                       | 9                     | 0                   |
| (PBST[Title/Abstract] and depolymerization[Title/Abstract])                                      | 0                     | 0                   |
| (PBSA[Title/Abstract] and depolymerization[Title/Abstract])                                      | 2                     | 0                   |
| (PBA[Title/Abstract] and depolymerization[Title/Abstract])                                       | 0                     | 0                   |
| (PBAT[Title/Abstract] and depolymerization[Title/Abstract])                                      | 0                     | 0                   |
| (PEF[Title/Abstract] and depolymerization[Title/Abstract])                                       | 1                     | 0                   |
| (PCL[Title/Abstract] and depolymerization[Title/Abstract])                                       | 10                    | 0                   |
| (PES[Title/Abstract] and depolymerization[Title/Abstract])                                       | 0                     | 0                   |
| (PEA[Title/Abstract] and depolymerization[Title/Abstract])                                       | 5                     | 0                   |
| (PS[Title/Abstract] and depolymerization[Title/Abstract])                                        | 22                    | 0                   |
| (PP[Title/Abstract] and depolymerization[Title/Abstract])                                        | 13                    | 3                   |
| (Polyethylene[Title/Abstract] and depolymerization[Title/Abstract])                              | 30                    | 0                   |
| (Polyurethane[Title/Abstract] and depolymerization[Title/Abstract])                              | 6                     | 0                   |
| (Polylactic acid[Title/Abstract] and depolymerization[Title/Abstract])                           | 6                     | 1                   |
| (Polyvinyl alcohol[Title/Abstract] and depolymerization[Title/Abstract])                         | 4                     | 1                   |
| (Polyvinyl chloride[Title/Abstract] and depolymerization[Title/Abstract])                        | 0                     | 0                   |
| (Poly(3-hydroxybutyrate)[Title/Abstract] and depolymerization[Title/Abstract])                   | 0                     | 0                   |
| (Poly(3-hydroxyalkanoates)[Title/Abstract] and depolymerization[Title/Abstract])                 | 0                     | 0                   |
| (Polyethylene terephthalate[Title/Abstract] and depolymerization[Title/Abstract])                | 5                     | 0                   |
| (Polybutylene succinate[Title/Abstract] and depolymerization[Title/Abstract])                    | 0                     | 0                   |
| (Poly(butylene succinate-co-terephthalate)[Title/Abstract] and depolymerization[Title/Abstract]) | 0                     | 0                   |
| (Poly(butylene succinate-co-adipate)[Title/Abstract] and depolymerization[Title/Abstract])       | 0                     | 0                   |
| (Polybutylene adipate[Title/Abstract] and depolymerization[Title/Abstract])                      | 1                     | 0                   |
| (Poly(butylene adipate-co-terephthalate)[Title/Abstract] and depolymerization[Title/Abstract])   | 0                     | 0                   |

|                                                                                               |      |    |
|-----------------------------------------------------------------------------------------------|------|----|
| (Poly(ethylene furanoate)[Title/Abstract] and depolymerization[Title/Abstract]                | 0    | 0  |
| (Polycaprolactone[Title/Abstract] and depolymerization[Title/Abstract]                        | 9    | 0  |
| (Polyethylene succinate[Title/Abstract] and depolymerization[Title/Abstract]                  | 0    | 0  |
| (Polyethylene adipate[Title/Abstract] and depolymerization[Title/Abstract]                    | 1    | 0  |
| (Polystyrene[Title/Abstract] and depolymerization[Title/Abstract]                             | 19   | 0  |
| (Polypropylene[Title/Abstract] and depolymerization[Title/Abstract]                           | 5    | 1  |
| (plastics[Title/Abstract] and bioremediation[Title/Abstract]                                  | 26   | 9  |
| (polymer[Title/Abstract] and bioremediation[Title/Abstract]                                   | 75   | 3  |
| (phtalate[Title/Abstract] and bioremediation[Title/Abstract]                                  | 52   | 25 |
| (PE[Title/Abstract] and bioremediation[Title/Abstract]                                        | 8    | 0  |
| (PU[Title/Abstract] and bioremediation[Title/Abstract]                                        | 9    | 1  |
| (PLA[Title/Abstract] and bioremediation[Title/Abstract]                                       | 2    | 1  |
| (PVA[Title/Abstract] and bioremediation[Title/Abstract]                                       | 15   | 1  |
| (PVC[Title/Abstract] and bioremediation[Title/Abstract]                                       | 9    | 8  |
| (PHB[Title/Abstract] and bioremediation[Title/Abstract]                                       | 10   | 1  |
| (PHA[Title/Abstract] and bioremediation[Title/Abstract]                                       | 10   | 0  |
| (PET[Title/Abstract] and bioremediation[Title/Abstract]                                       | 12   | 2  |
| (PBS[Title/Abstract] and bioremediation[Title/Abstract]                                       | 6    | 1  |
| (PBST[Title/Abstract] and bioremediation[Title/Abstract]                                      | 1    | 1  |
| (PBSA[Title/Abstract] and bioremediation[Title/Abstract]                                      | 1    | 1  |
| (PBA[Title/Abstract] and bioremediation[Title/Abstract]                                       | 10   | 0  |
| (PBAT[Title/Abstract] and bioremediation[Title/Abstract]                                      | 1    | 1  |
| (PEF[Title/Abstract] and bioremediation[Title/Abstract]                                       | 0    | 0  |
| (PCL[Title/Abstract] and bioremediation[Title/Abstract]                                       | 2    | 1  |
| (PES[Title/Abstract] and bioremediation[Title/Abstract]                                       | 6    | 2  |
| (PEA[Title/Abstract] and bioremediation[Title/Abstract]                                       | 11   | 0  |
| (PS[Title/Abstract] and bioremediation[Title/Abstract]                                        | 25   | 0  |
| (PP[Title/Abstract] and bioremediation[Title/Abstract]                                        | 12   | 0  |
| (Polyethylene[Title/Abstract] and bioremediation[Title/Abstract]                              | 30   | 6  |
| (Polyurethane[Title/Abstract] and bioremediation[Title/Abstract]                              | 21   | 4  |
| (Polylactic acid[Title/Abstract] and bioremediation[Title/Abstract]                           | 1    | 0  |
| (Polyvinyl alcohol[Title/Abstract] and bioremediation[Title/Abstract]                         | 17   | 2  |
| (Polyvinyl chloride[Title/Abstract] and bioremediation[Title/Abstract]                        | 5    | 5  |
| (Poly(3-hydroxybutyrate)[Title/Abstract] and bioremediation[Title/Abstract]                   | 0    | 0  |
| (Poly(3-hydroxyalkanoates)[Title/Abstract] and bioremediation[Title/Abstract]                 | 0    | 0  |
| (Polyethylene terephthalate[Title/Abstract] and bioremediation[Title/Abstract]                | 2    | 2  |
| (Polybutylene succinate[Title/Abstract] and bioremediation[Title/Abstract]                    | 0    | 0  |
| (Poly(butylene succinate-co-terephthalate)[Title/Abstract] and bioremediation[Title/Abstract] | 0    | 0  |
| (Poly(butylene succinate-co-adipate)[Title/Abstract] and bioremediation[Title/Abstract]       | 0    | 0  |
| (Polybutylene adipate[Title/Abstract] and bioremediation[Title/Abstract]                      | 0    | 0  |
| (Poly(butylene adipate-co-terephthalate)[Title/Abstract] and bioremediation[Title/Abstract]   | 0    | 0  |
| (Poly(ethylene furanoate)[Title/Abstract] and bioremediation[Title/Abstract]                  | 0    | 0  |
| (Polycaprolactone[Title/Abstract] and bioremediation[Title/Abstract]                          | 2    | 0  |
| (Polyethylene succinate[Title/Abstract] and bioremediation[Title/Abstract]                    | 5    | 2  |
| (Polyethylene adipate[Title/Abstract] and bioremediation[Title/Abstract]                      | 0    | 0  |
| (Polystyrene[Title/Abstract] and bioremediation[Title/Abstract]                               | 11   | 2  |
| (Polypropylene[Title/Abstract] and bioremediation[Title/Abstract]                             | 7    | 1  |
| (enzyme[Title/Abstract] AND plastics[Title/Abstract]                                          | 164  | 9  |
| (enzyme[Title/Abstract] AND polymer[Title/Abstract]                                           | 4704 | 10 |
| (enzyme[Title/Abstract] AND phthalate[Title/Abstract]                                         | 430  | 8  |
| (enzyme[Title/Abstract] AND PE[Title/Abstract]                                                | 1384 | 0  |
| (enzyme[Title/Abstract] AND PU[Title/Abstract]                                                | 197  | 0  |
| (enzyme[Title/Abstract] AND PLA[Title/Abstract]                                               | 846  | 4  |
| (enzyme[Title/Abstract] AND PVA[Title/Abstract]                                               | 270  | 9  |
| (enzyme[Title/Abstract] AND PVC[Title/Abstract]                                               | 110  | 1  |
| (enzyme[Title/Abstract] AND PHB[Title/Abstract]                                               | 276  | 16 |
| (enzyme[Title/Abstract] AND PHA[Title/Abstract]                                               | 853  | 6  |
| (enzyme[Title/Abstract] AND PET[Title/Abstract]                                               | 1800 | 7  |
| (enzyme[Title/Abstract] AND PBS[Title/Abstract]                                               | 1205 | 0  |
| (enzyme[Title/Abstract] AND PBST[Title/Abstract]                                              | 22   | 0  |
| (enzyme[Title/Abstract] AND PBSA[Title/Abstract]                                              | 117  | 0  |
| (enzyme[Title/Abstract] AND PBA[Title/Abstract]                                               | 125  | 0  |
| (enzyme[Title/Abstract] AND PBAT[Title/Abstract]                                              | 7    | 5  |
| (enzyme[Title/Abstract] AND PEF[Title/Abstract]                                               | 106  | 2  |
| (enzyme[Title/Abstract] AND PCL[Title/Abstract]                                               | 195  | 7  |
| (enzyme[Title/Abstract] AND PES[Title/Abstract]                                               | 150  | 1  |
| (enzyme[Title/Abstract] AND PEA[Title/Abstract]                                               | 1476 | 0  |
| (enzyme[Title/Abstract] AND PS[Title/Abstract]                                                | 1881 | 0  |
| (enzyme[Title/Abstract] AND PP[Title/Abstract]                                                | 1441 | 0  |
| (enzyme[Title/Abstract] AND Polyethylene[Title/Abstract]                                      | 2125 | 13 |
| (enzyme[Title/Abstract] AND Polyurethane[Title/Abstract]                                      | 263  | 9  |
| (enzyme[Title/Abstract] AND Polylactic acid[Title/Abstract]                                   | 43   | 1  |
| (enzyme[Title/Abstract] AND Polyvinyl alcohol[Title/Abstract]                                 | 230  | 9  |
| (enzyme[Title/Abstract] AND Polyvinyl chloride[Title/Abstract]                                | 77   | 1  |
| (enzyme[Title/Abstract] AND Poly(3-hydroxybutyrate)[Title/Abstract]                           | 0    | 0  |
| (enzyme[Title/Abstract] AND Poly(3-hydroxyalkanoates)[Title/Abstract]                         | 0    | 0  |
| (enzyme[Title/Abstract] AND Polyethylene terephthalate[Title/Abstract]                        | 61   | 5  |
| (enzyme[Title/Abstract] AND Polybutylene succinate[Title/Abstract]                            | 6    | 0  |
| (enzyme[Title/Abstract] AND Poly(butylene succinate-co-terephthalate)[Title/Abstract]         | 0    | 0  |
| (enzyme[Title/Abstract] AND Poly(butylene succinate-co-adipate)[Title/Abstract]               | 0    | 0  |
| (enzyme[Title/Abstract] AND Polybutylene adipate[Title/Abstract]                              | 1    | 0  |
| (enzyme[Title/Abstract] AND Poly(butylene adipate-co-terephthalate)[Title/Abstract]           | 0    | 0  |
| (enzyme[Title/Abstract] AND Poly(ethylene furanoate)[Title/Abstract]                          | 0    | 0  |
| (enzyme[Title/Abstract] AND Polycaprolactone[Title/Abstract]                                  | 78   | 6  |
| (enzyme[Title/Abstract] AND Polyethylene succinate[Title/Abstract]                            | 1    | 0  |
| (enzyme[Title/Abstract] AND Polyethylene adipate[Title/Abstract]                              | 6    | 0  |
| (enzyme[Title/Abstract] AND Polystyrene[Title/Abstract]                                       | 1317 | 0  |
| (enzyme[Title/Abstract] AND Polypropylene[Title/Abstract]                                     | 162  | 0  |
